# Supplementary material for: Closed-loop stimulation of lateral cervical spinal cord in upper-limb amputees to enable sensory discrimination: a case study
Source: PubMed Central journal article supplement (PMC9553970; doi:10.1038/s41598-022-21264-7), 2022-10-11
Supplement: 41598_2022_21264_MOESM5_ESM.pdf [file 41598_2022_21264_MOESM5_ESM.pdf]

## Supplementary Figures

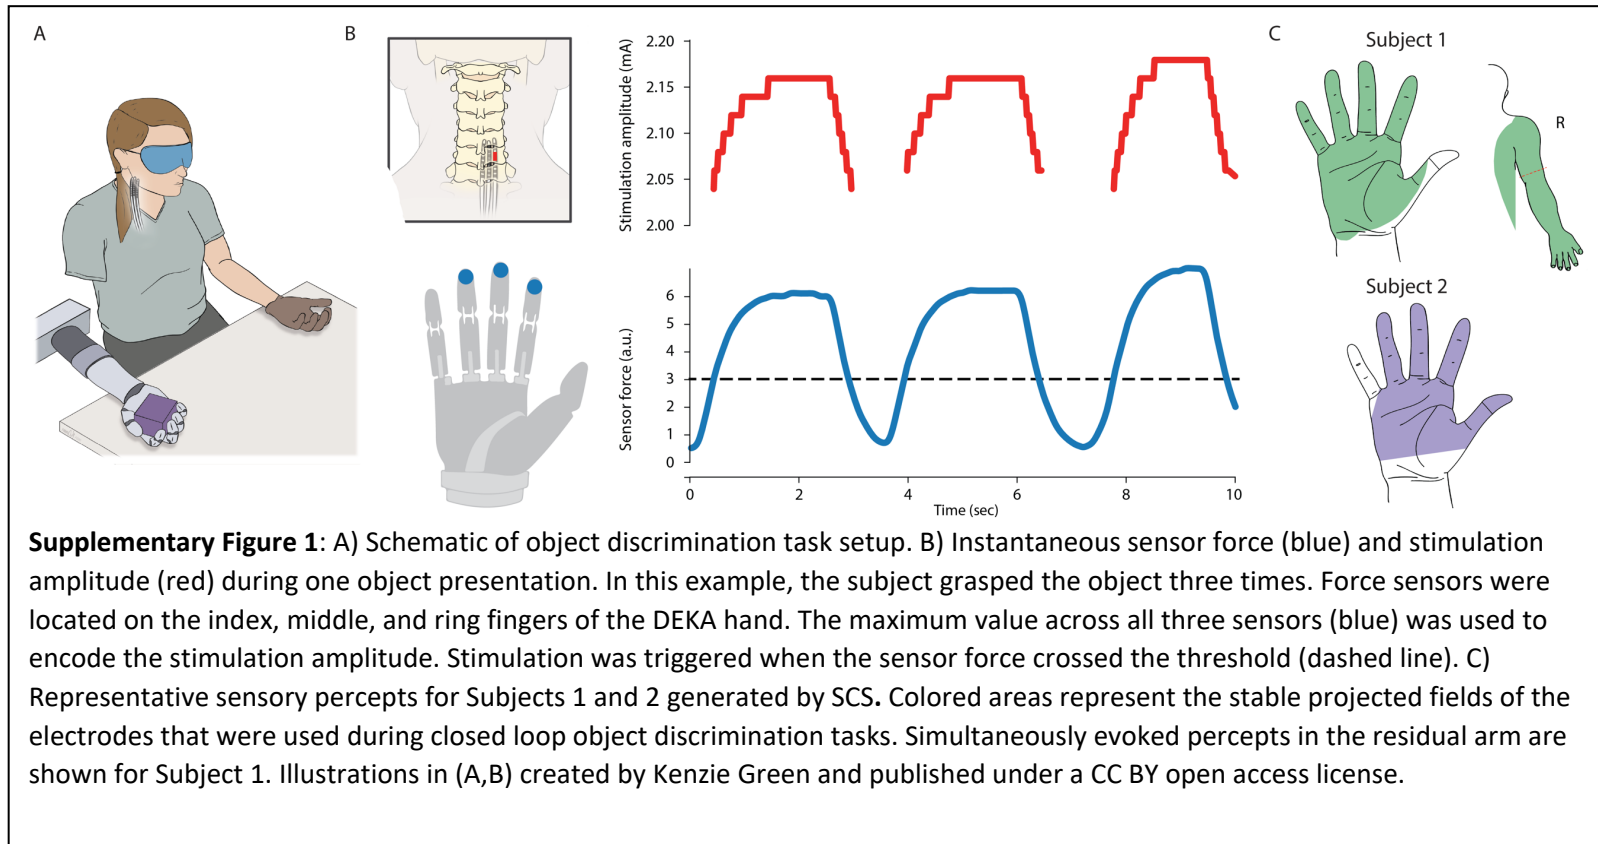

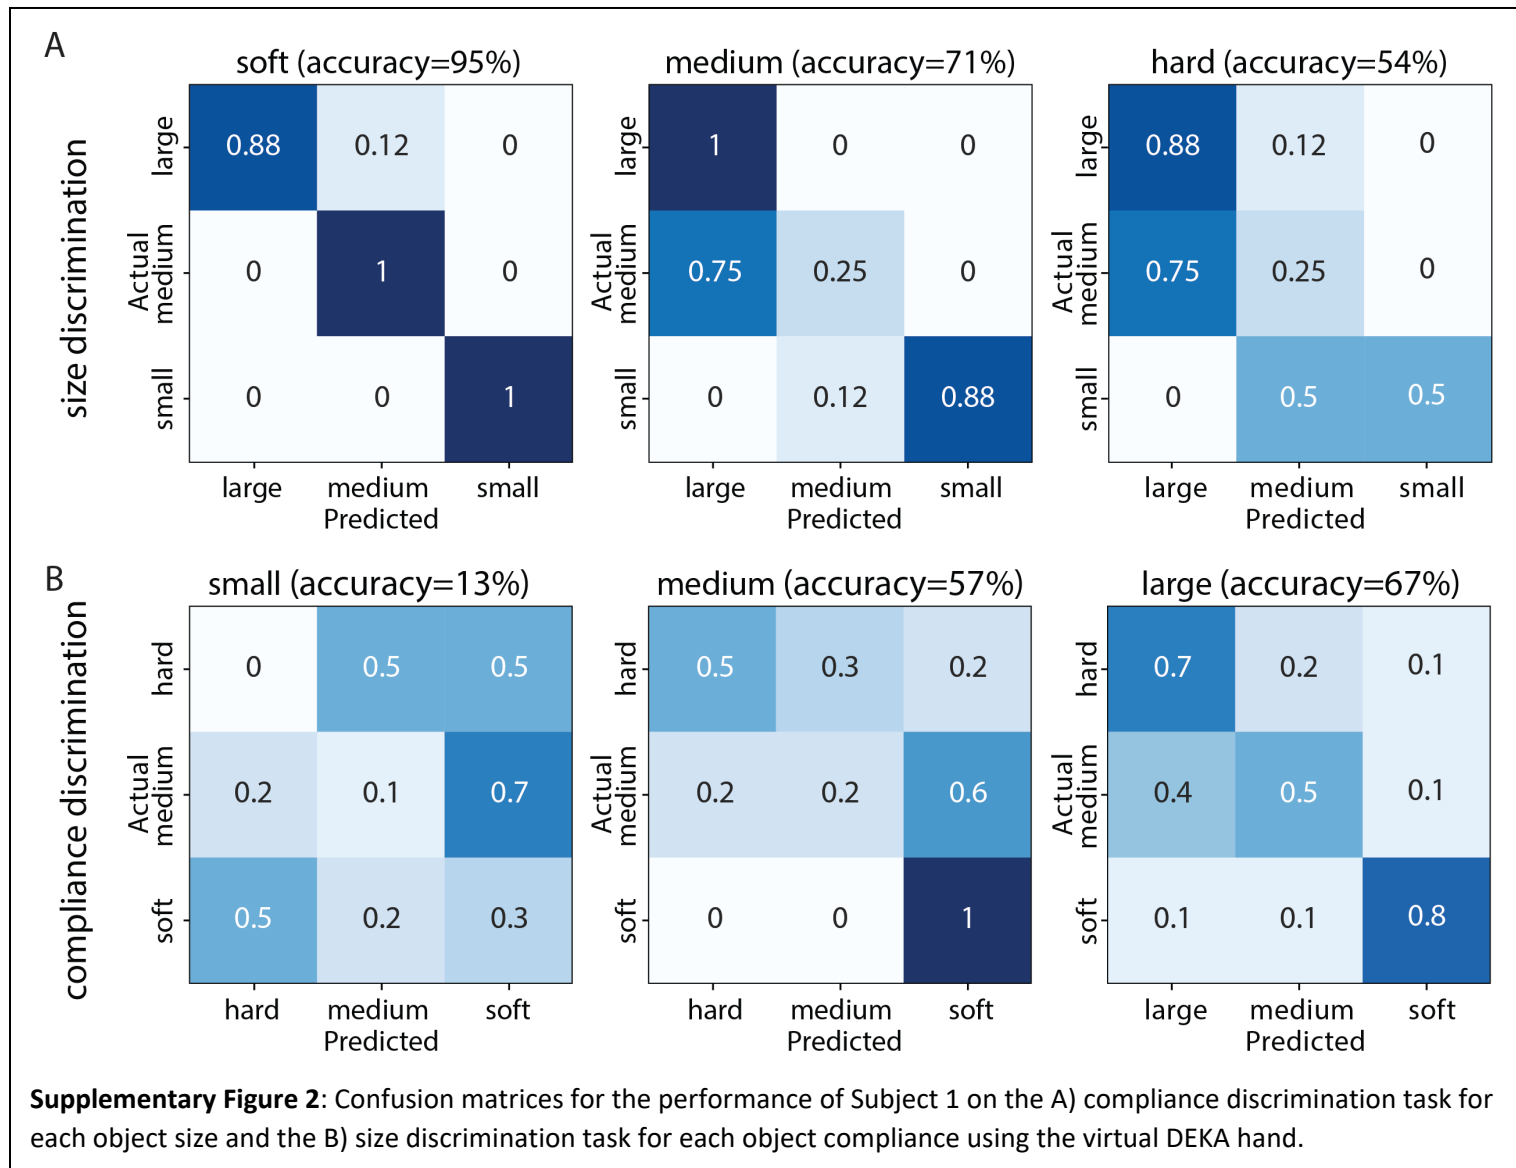

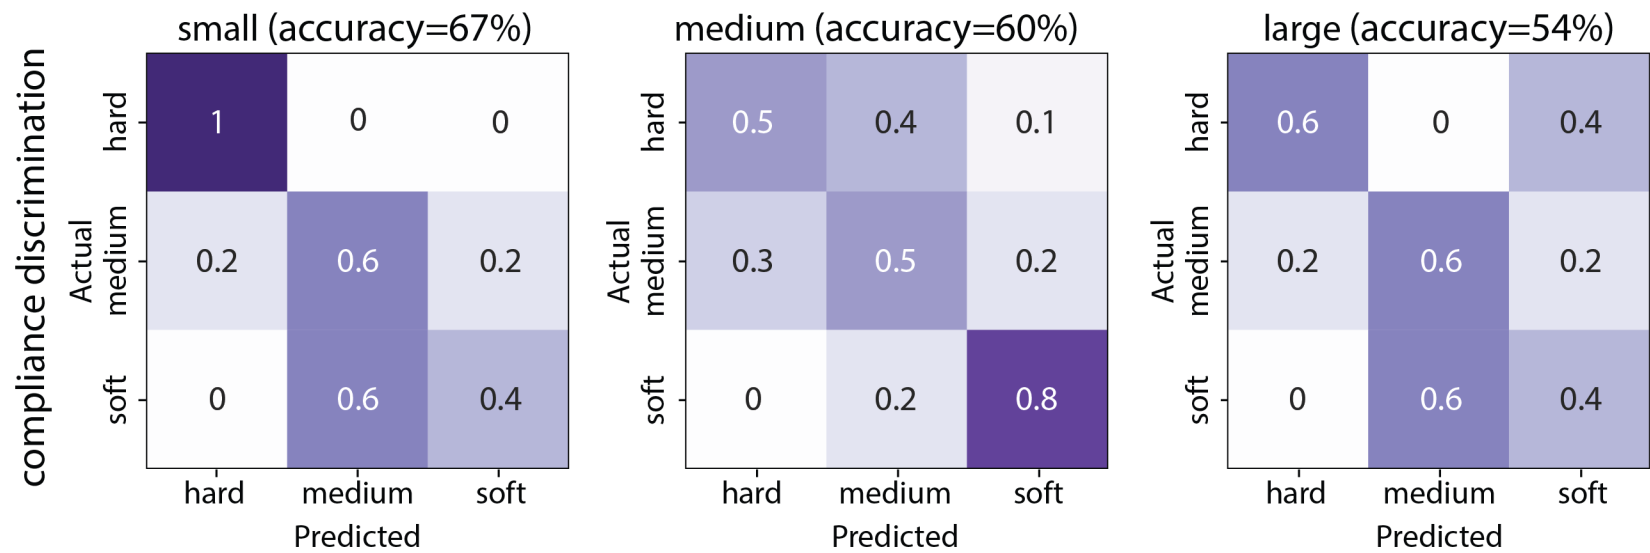

**Supplementary Figure 3:** Confusion matrices for the performance of Subject 2 on the compliance discrimination task for each object size using the physical DEKA hand.

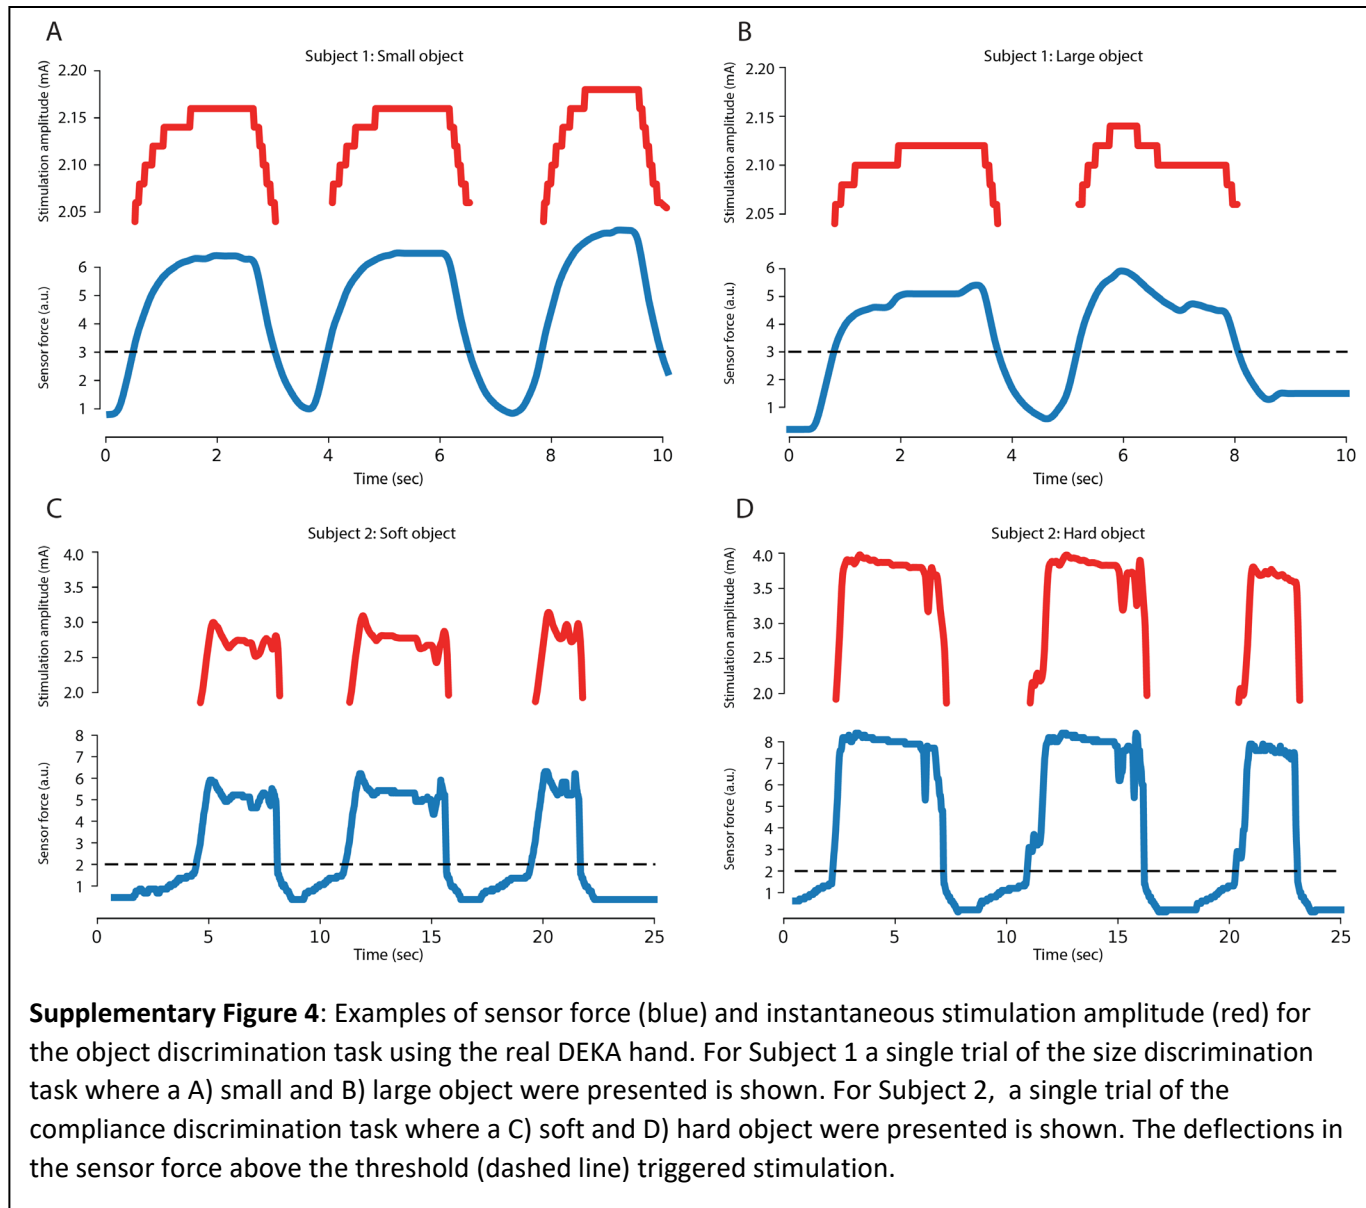

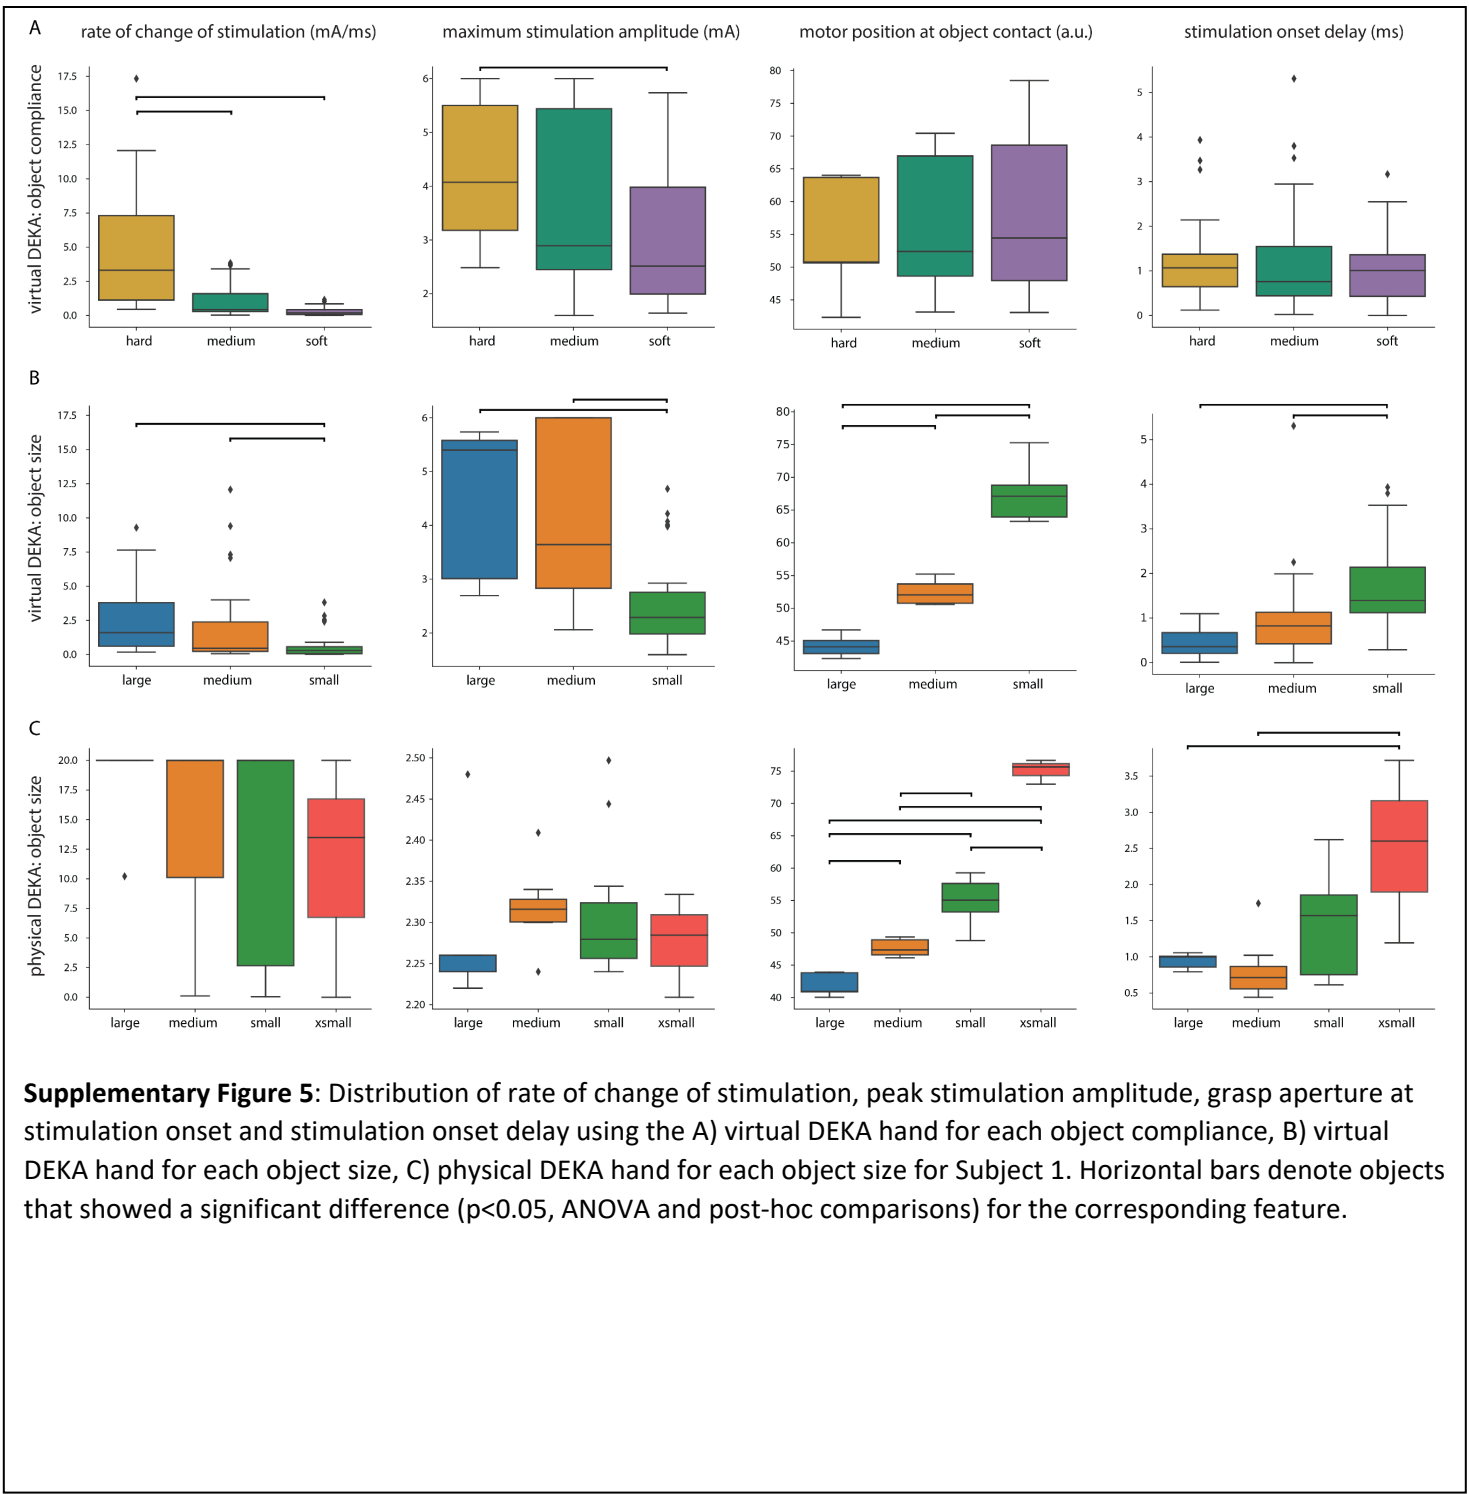

**Supplementary Figure 5:** Distribution of rate of change of stimulation, peak stimulation amplitude, grasp aperture at stimulation onset and stimulation onset delay using the A) virtual DEKA hand for each object compliance, B) virtual DEKA hand for each object size, C) physical DEKA hand for each object size for Subject 1. Horizontal bars denote objects that showed a significant difference ( $p < 0.05$ , ANOVA and post-hoc comparisons) for the corresponding feature.

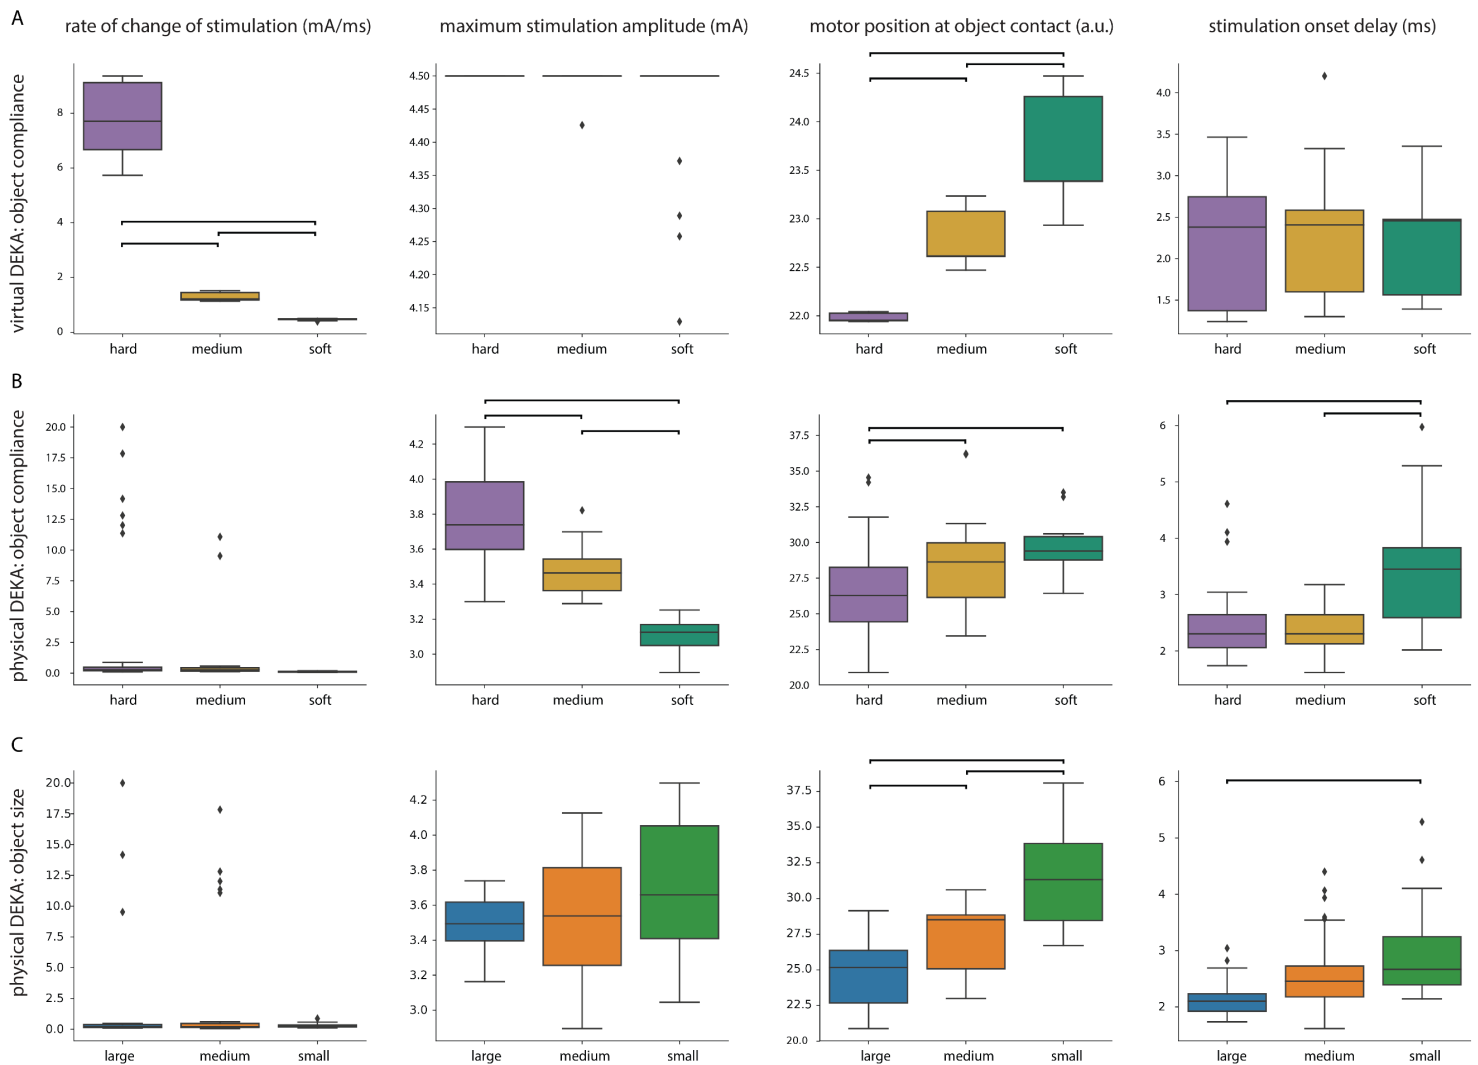

**Supplementary Figure 6:** Distribution of rate of change of stimulation, peak stimulation amplitude, grasp aperture at stimulation onset and stimulation onset delay using the A) virtual DEKA hand for each object compliance, B) physical DEKA hand for each object compliance, C) physical DEKA hand for each object size for Subject 2. Horizontal bars denote objects that showed a significant difference ( $p < 0.05$ , ANOVA and post-hoc comparisons) for the corresponding feature.
